# Supplementary material for: Preliminary evidence for association of genetic variants in pri-miR-34b/c and abnormal miR-34c expression with attention deficit and hyperactivity disorder
Source: PubMed Central journal article supplement (PMC5022091; doi:10.1038/tp.2016.151), 2016-08-30

## Supplementary Figure 1

Graphical representation of the chromosomal region containing the miR-34b/c cluster and the 3' Untranslated Regions (3'UTRs) of the *MET*, *NOTCH2* and *HMGA2* genes, including the SNPs selected for the association study and the putative miRNA binding sites. (\*) In bold, SNPs associated with ADHD.

### *MIR34B* and *MIR34C*

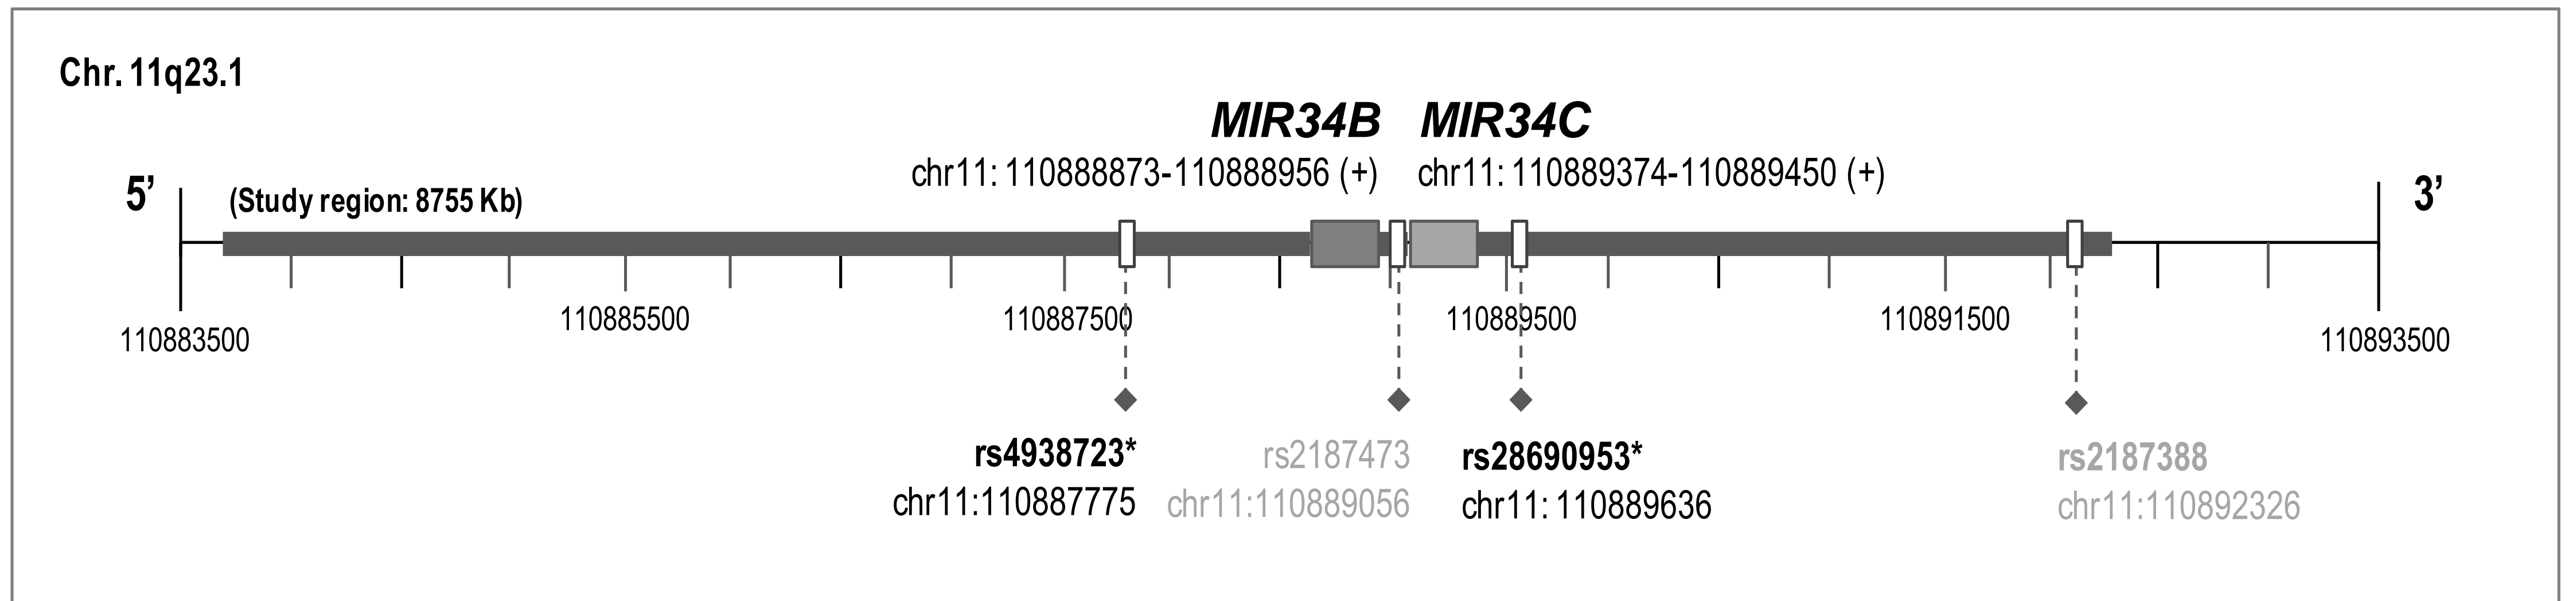

### *MET*

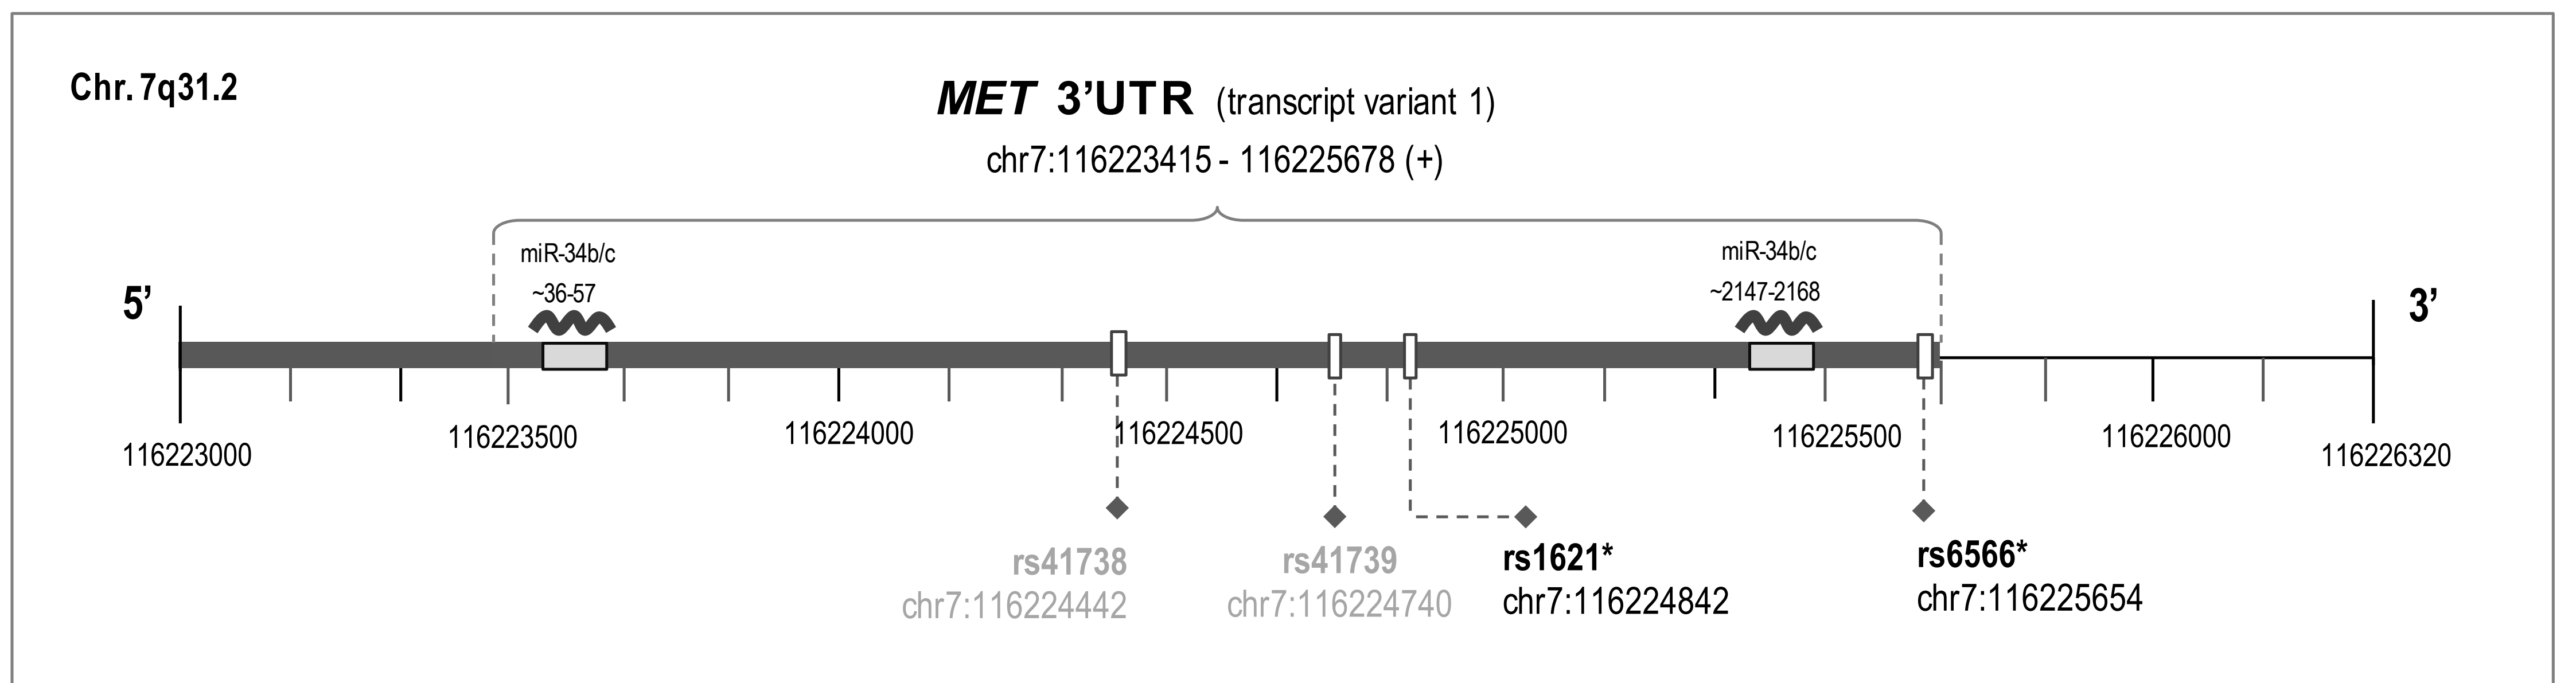

### *NOTCH2*

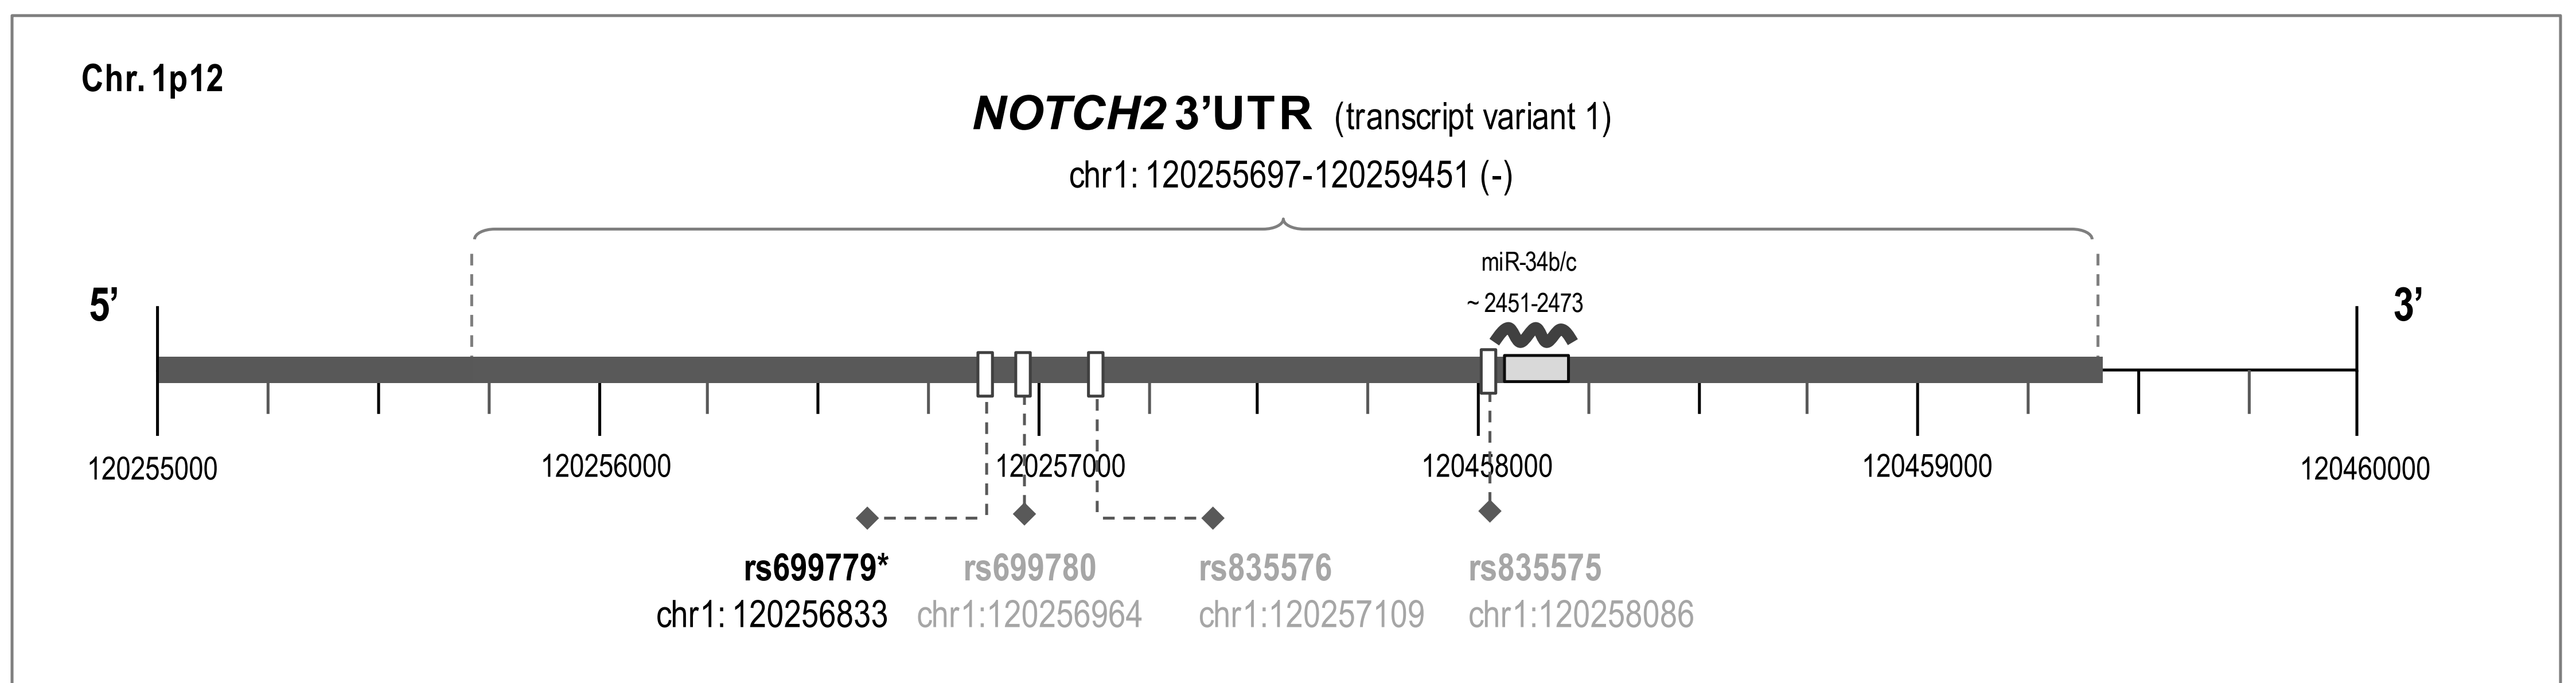

### *HMGA2*

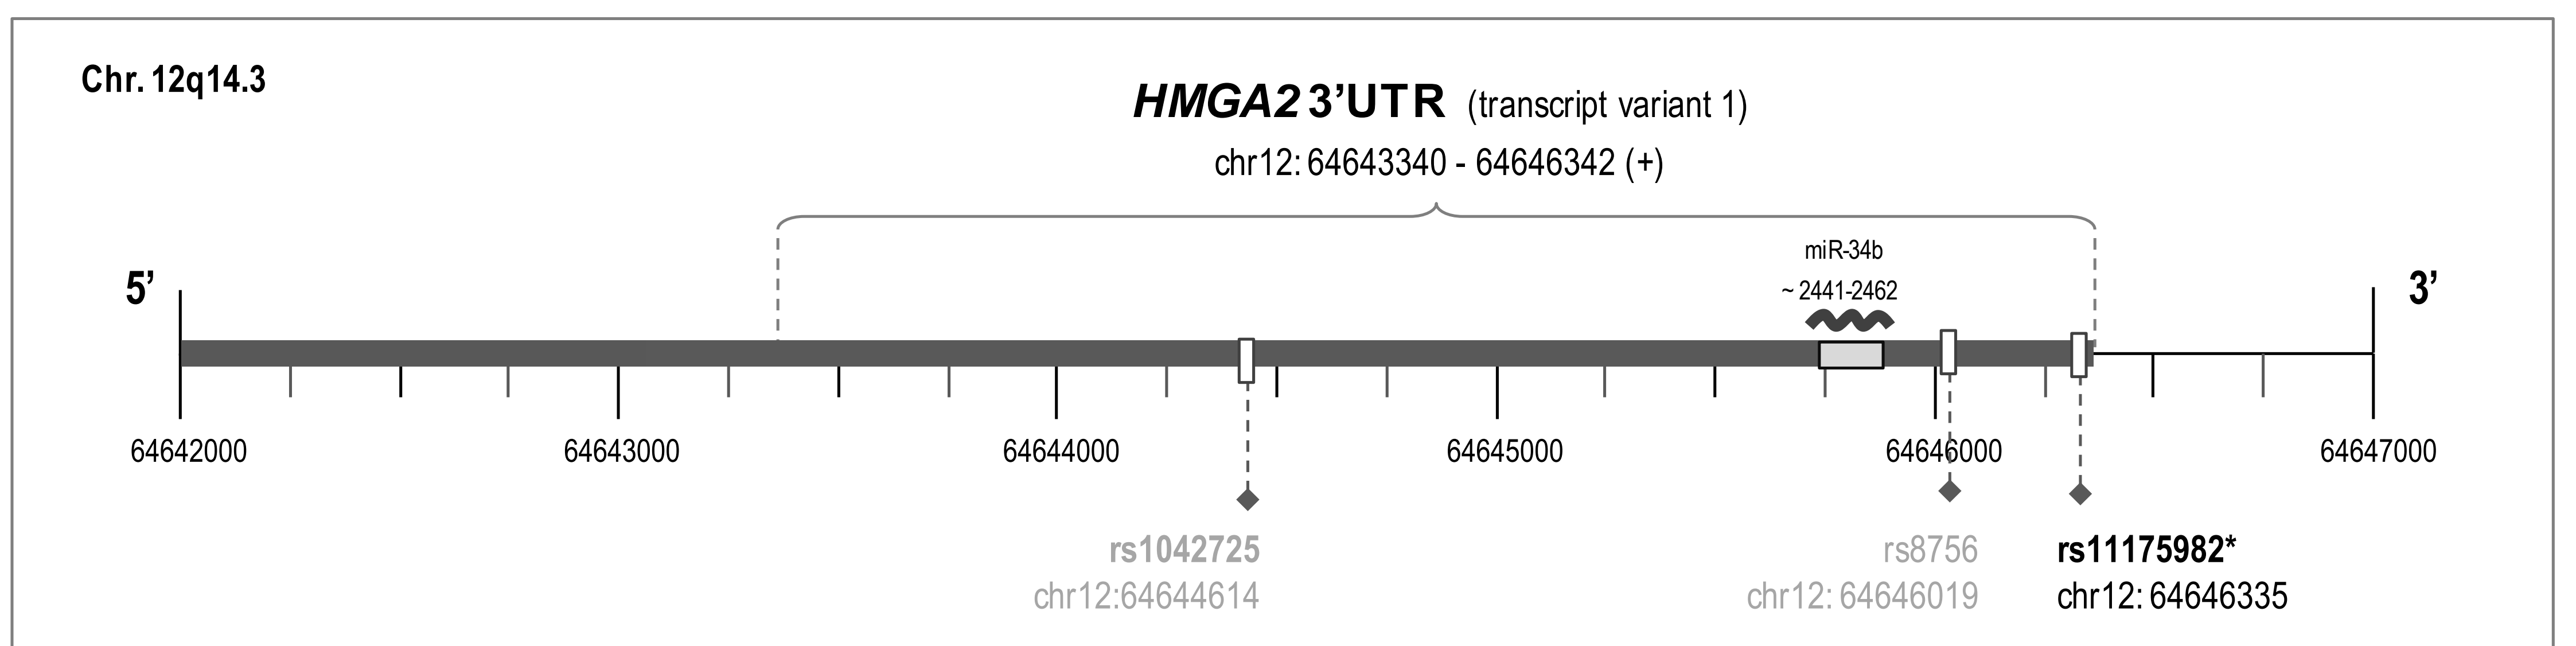

Supplement: tp2016151x12.pdf [file tp2016151x12.pdf]
